# Supplementary material for: Synergy of Iron Chelators and Therapeutic Peptide Sequences Delivered via a Magnetic Nanocarrier
Source: J Funct Biomater. 2017 Jun 26;8(3):23. doi: 10.3390/jfb8030023 (PMC5618274; doi:10.3390/jfb8030023)
Supplement: Supplementary file 1 [file jfb-08-00023-s001.docx]

Synergy of Iron Chelators and Therapeutic Peptide Sequences

Gayani S. Abayaweera 1, Hongwang Wang 1, Tej B. Shrestha 2, Jing Yu 1, Kyle Angle 1, Prem Thapa 3, Aruni P. Malalasekera 1, Leila Maurmann 1, Deryl L. Troyer 2, and Stefan H. Bossmann 1,*

1 Kansas State University, Department of Chemistry, Manhattan, KS 66041, USA;

2 Kansas State University, Department of Anatomy & Physiology, Manhattan, KS 66041, USA;

3 University of Kansas, Microscopy and Analytical Imaging Laboratory, Lawrence, KS 66045. USA

***** Correspondence: sbossman@ksu.edu; Tel.: +001-785-532-6817


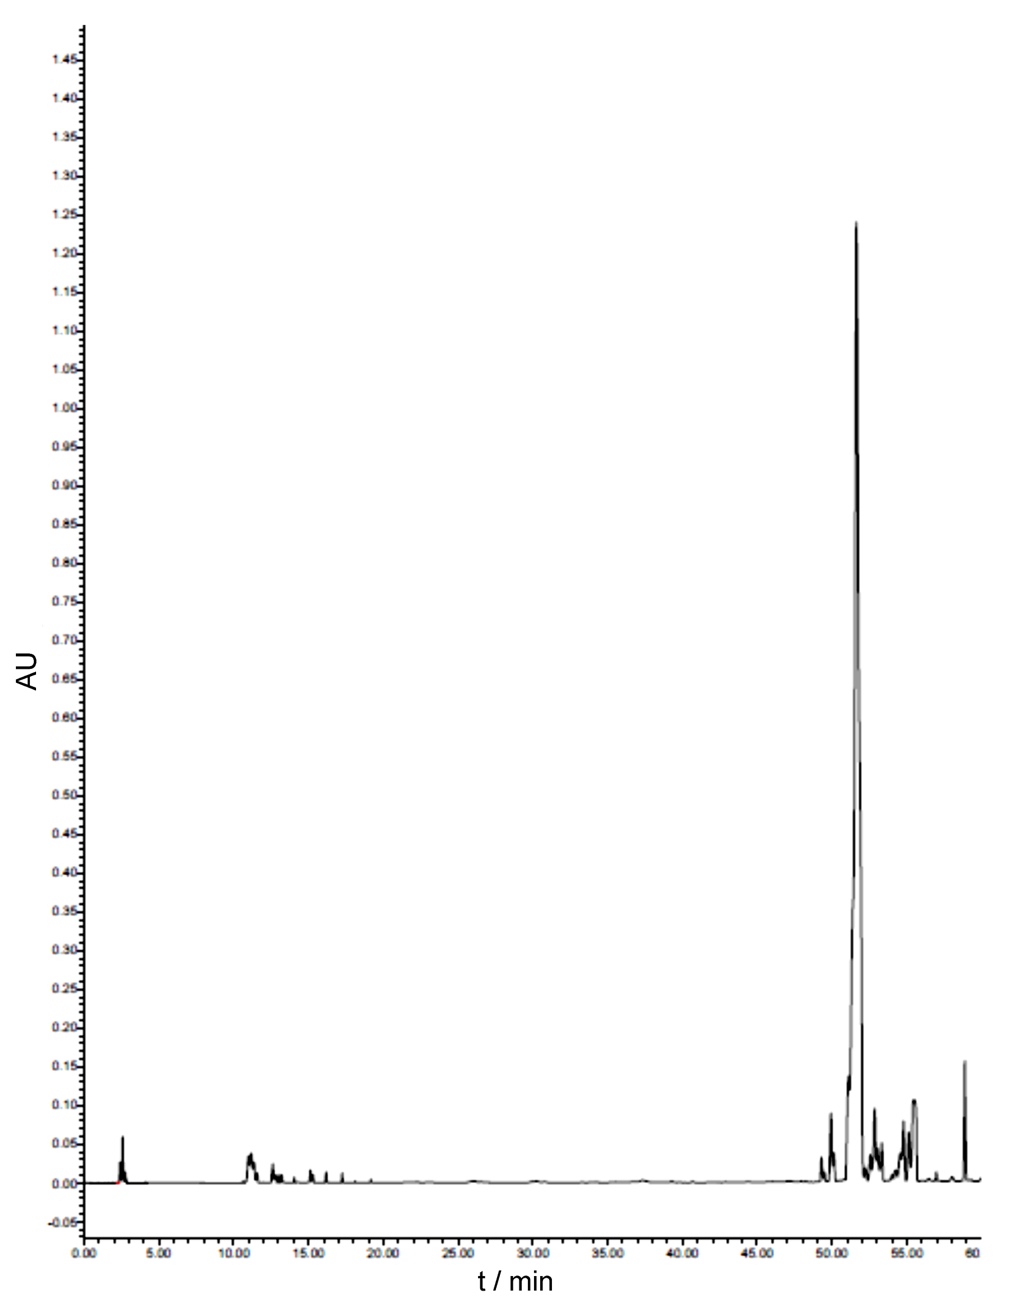


**Figure S1**. HPLC of PLFAERL(D[KLAKLAKKLAKLAK]) CGKRK. At t = 51.62 min the peptide was detected and characterized by MALDI-TOF (Figure S2). Its purity was determined to 94.6 %, assuming that all intermediates have the same UV-absorption at 200nm.


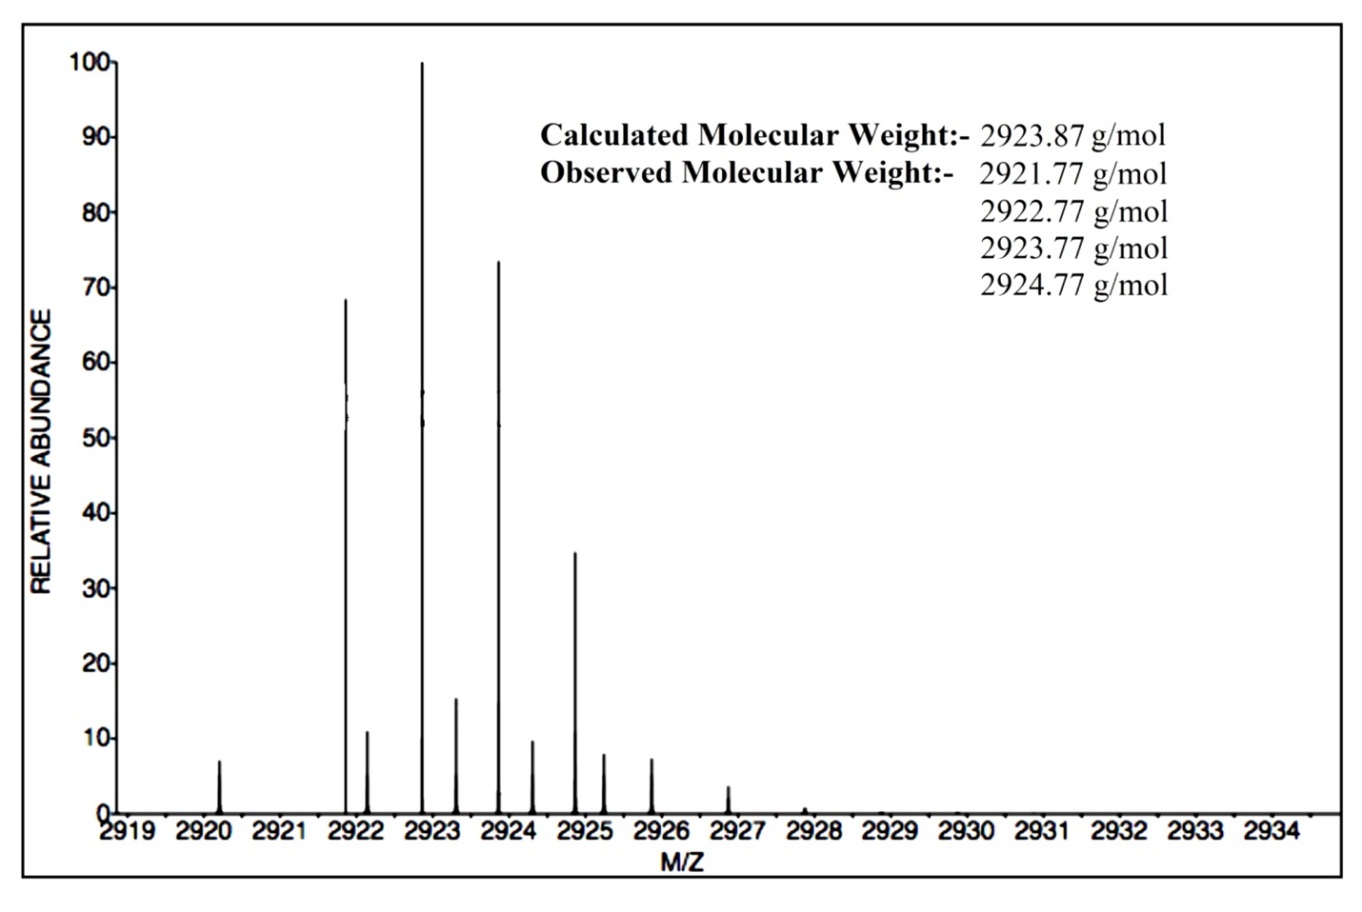


**Figure S2.** MALDI-TOF of PLFAERL(D[KLAKLAKKLAKLAK])CGKRK (Voyager DE STR).


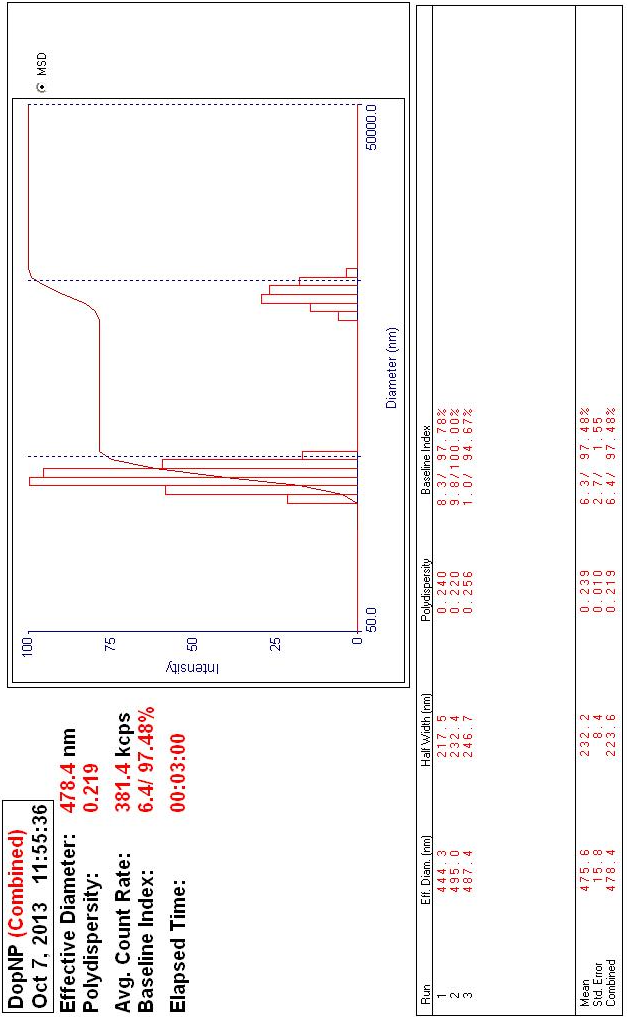


**Figure S3.** Dynamic Light Scattering (DLS) characterization of dopamine-coated Fe/Fe3O4 in phosphate-buffered saline (PBS), see Table 2.


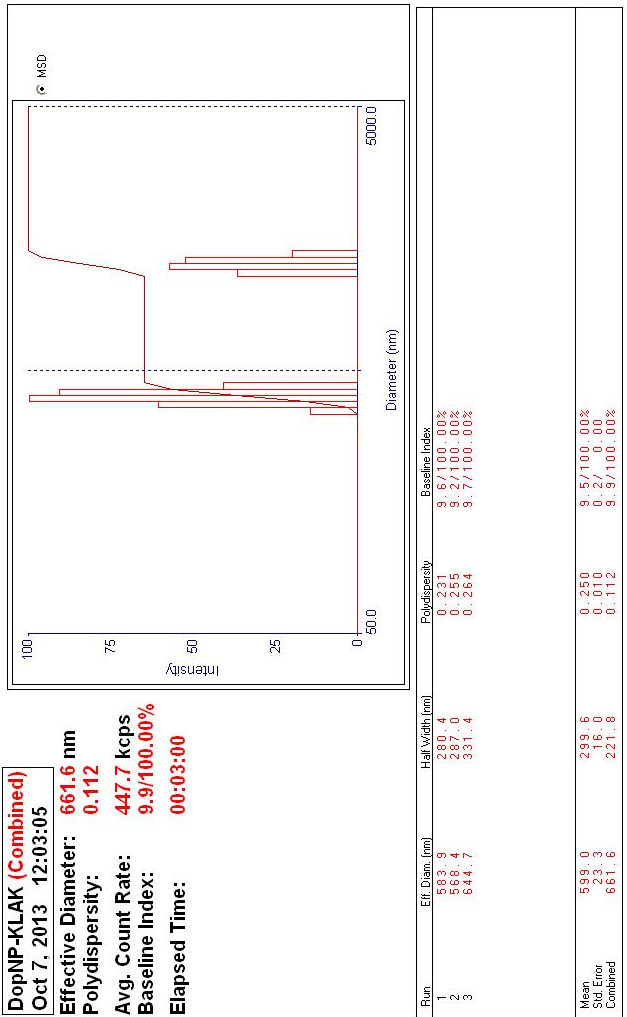


**Figure S4.** DLS characterization of PLFAERD[KLAKLAK]2**C**GKRK-tethered dopamine-coated Fe/Fe3O4 in PBS (Dop-Fe/Fe3O4 Peptide), see Table 2.


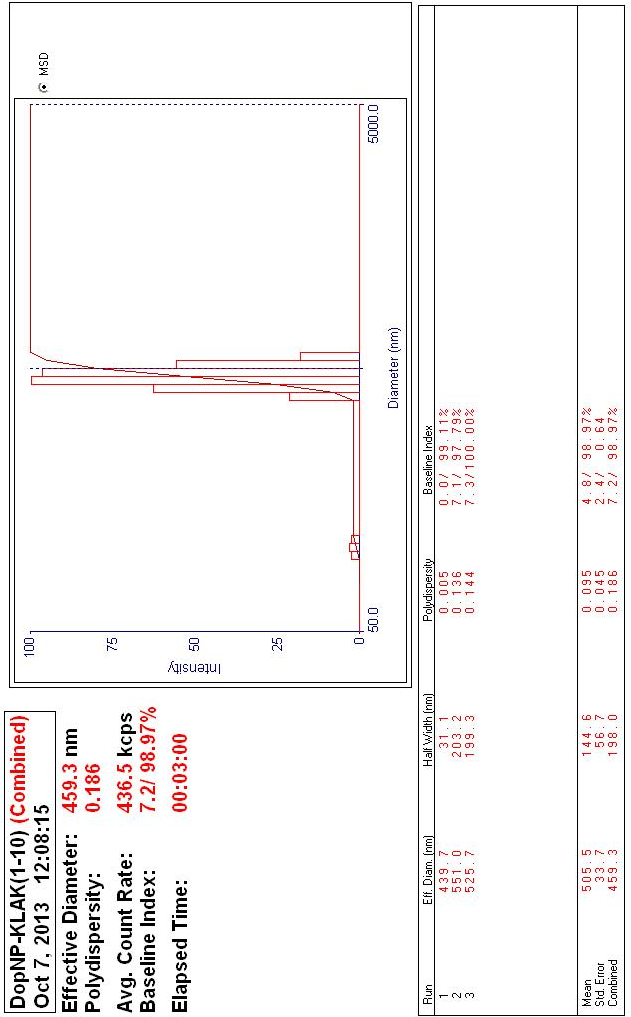


**Figure S5.** DLS characterization of PLFAERD[KLAKLAK]2**C**GKRK- and Dp44mT-derivative- tethered dopamine-coated Fe/Fe3O4 in PBS (Dop-Fe/Fe3O4 Peptide/Dp44mT (1:10)), ratio of Peptide to Dp44mT = 1/103, see Table 2.


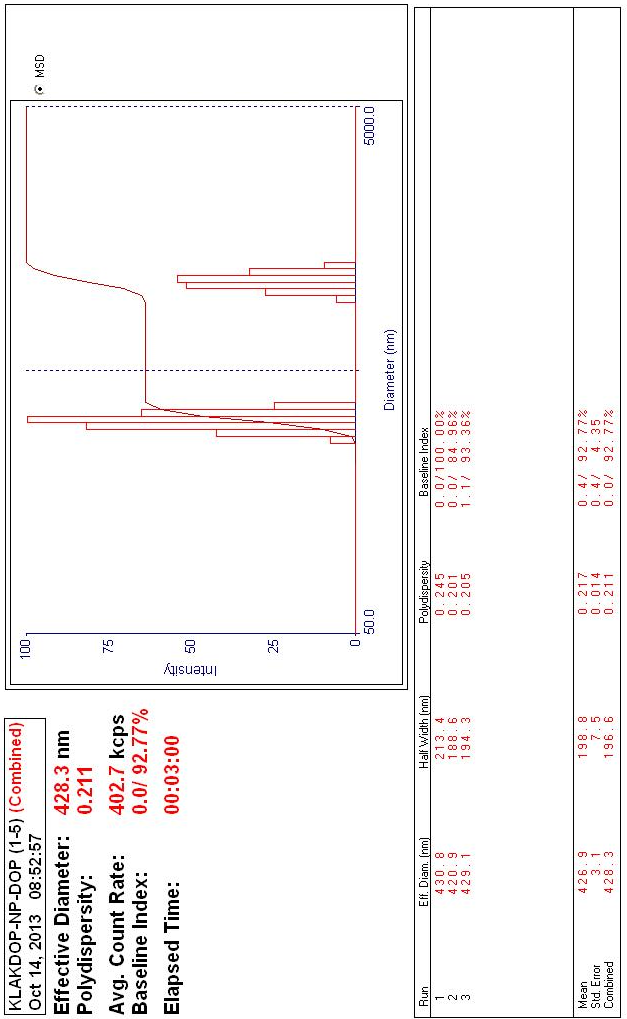


**Figure S6.** DLS characterization of PLFAERD[KLAKLAK]2**C**GKRK- and Dp44mT-derivative- tethered dopamine-coated Fe/Fe3O4 in PBS (Dop-Fe/Fe3O4 Peptide/Dp44mT (1:5)), ratio of Peptide to Dp44mT = 1/74, see Table 2.


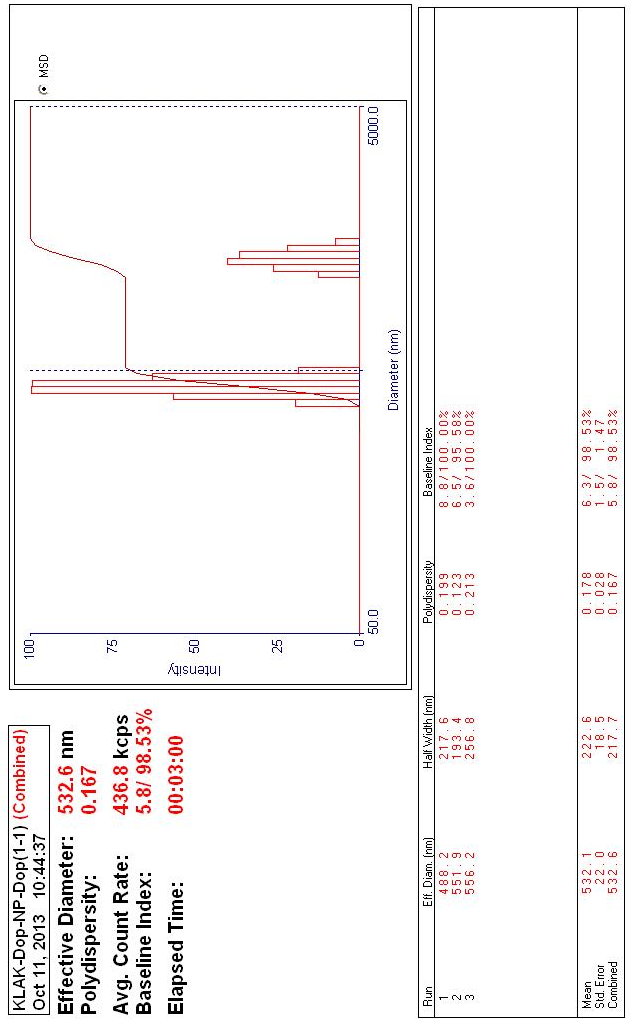


**Figure S7.** DLS characterization of PLFAERD[KLAKLAK]2**C**GKRK- and Dp44mT-derivative- tethered dopamine-coated Fe/Fe3O4 in PBS (Dop-Fe/Fe3O4 Peptide/Dp44mT (1:1)), ratio of Peptide to Dp44mT = 1/27, see Table 2.


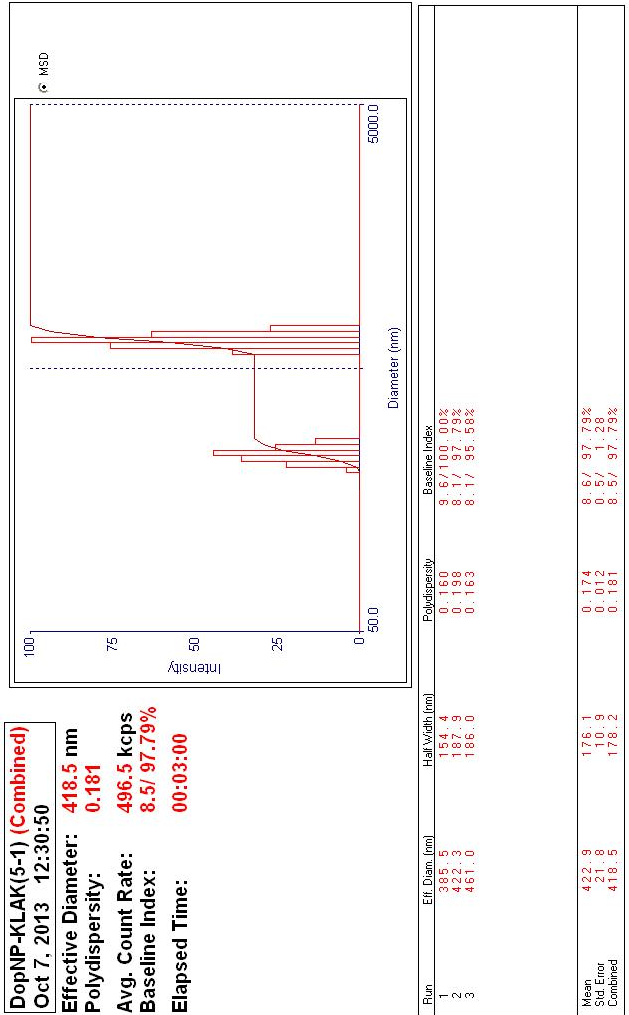


**Figure S8.** DLS characterization of PLFAERD[KLAKLAK]2**C**GKRK- and Dp44mT-derivative- tethered dopamine-coated Fe/Fe3O4 in PBS (Dop-Fe/Fe3O4 Peptide/Dp44mT (5:1)), ratio of Peptide to Dp44mT = 1/3.2, see Table 2.


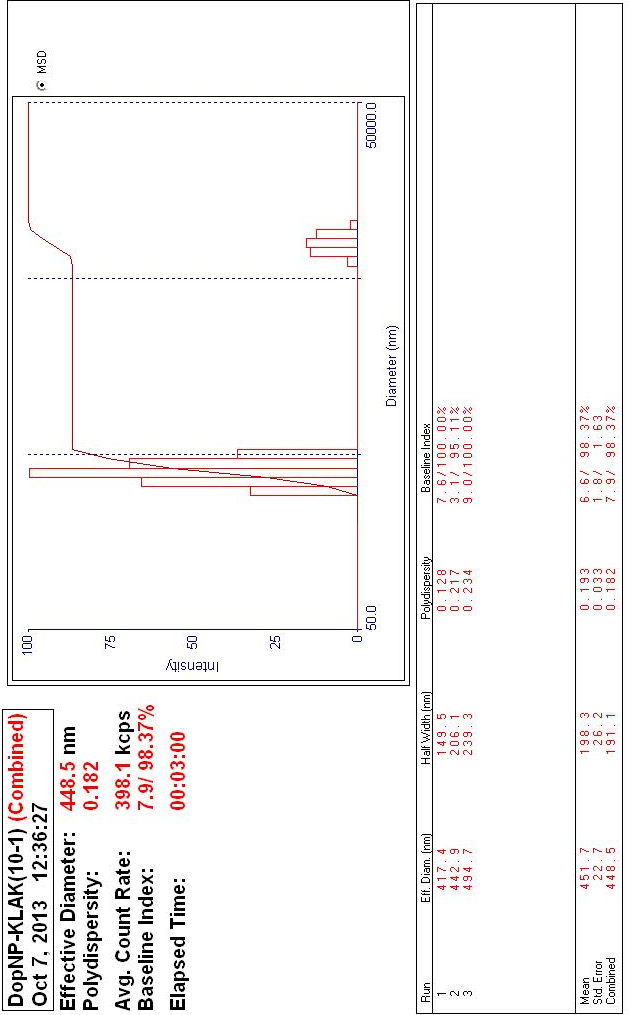


**Figure S9.** DLS characterization of PLFAERD[KLAKLAK]2**C**GKRK- and Dp44mT-derivative- tethered dopamine-coated Fe/Fe3O4 in PBS (Dop-Fe/Fe3O4 Peptide/Dp44mT (10:1)), ratio of Peptide to Dp44mT = 1/1.1, see Table 2.


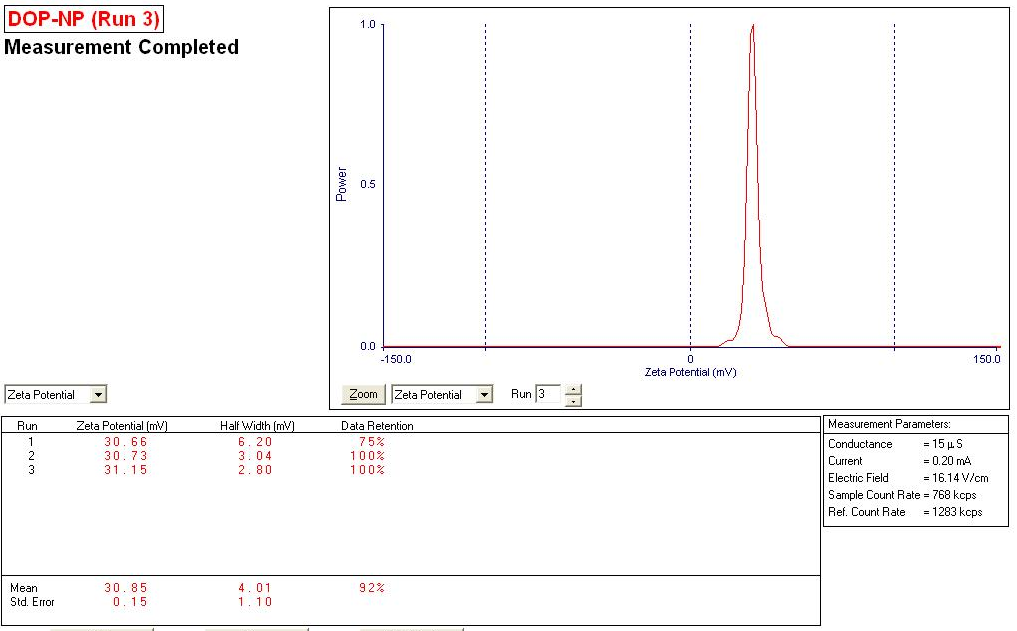


**Figure S10.** Zeta potential of dopamine-coated Fe/Fe3O4 in PBS.

**
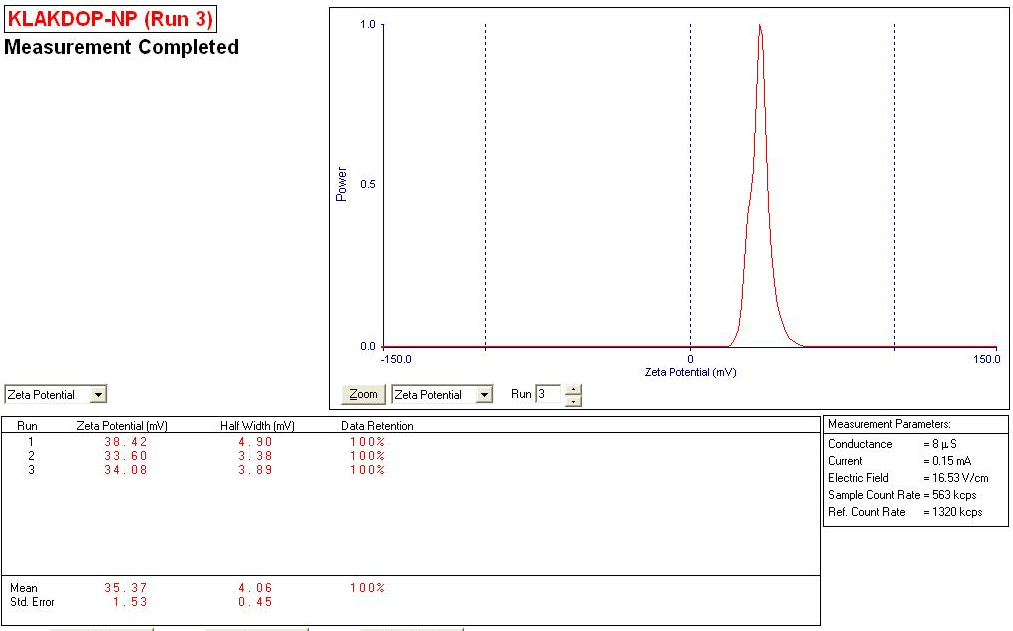
**

**Figure S11.** Zeta potential of of PLFAERD[KLAKLAK]2**C**GKRK-tethered dopamine-coated Fe/Fe3O4 in PBS (Dop-Fe/Fe3O4 Peptide), see Table 2.


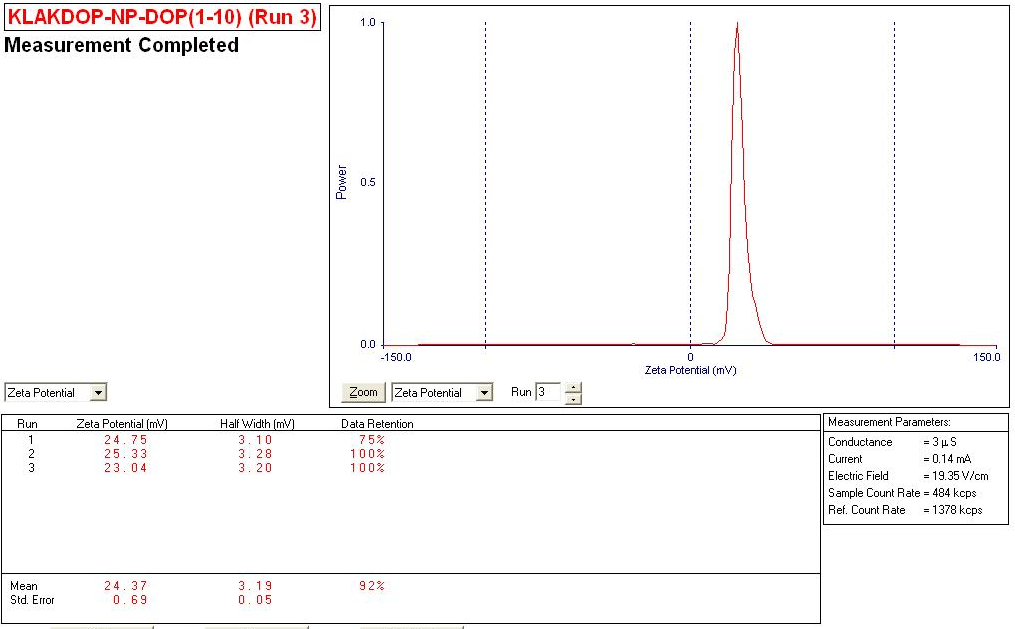


**Figure S12.** Zeta potential of PLFAERD[KLAKLAK]2**C**GKRK- and Dp44mT-derivative- tethered dopamine-coated Fe/Fe3O4 (Dop-Fe/Fe3O4 Peptide/Dp44mT (1:10)), ratio of Peptide to Dp44mT = 1/103, see Table 2.


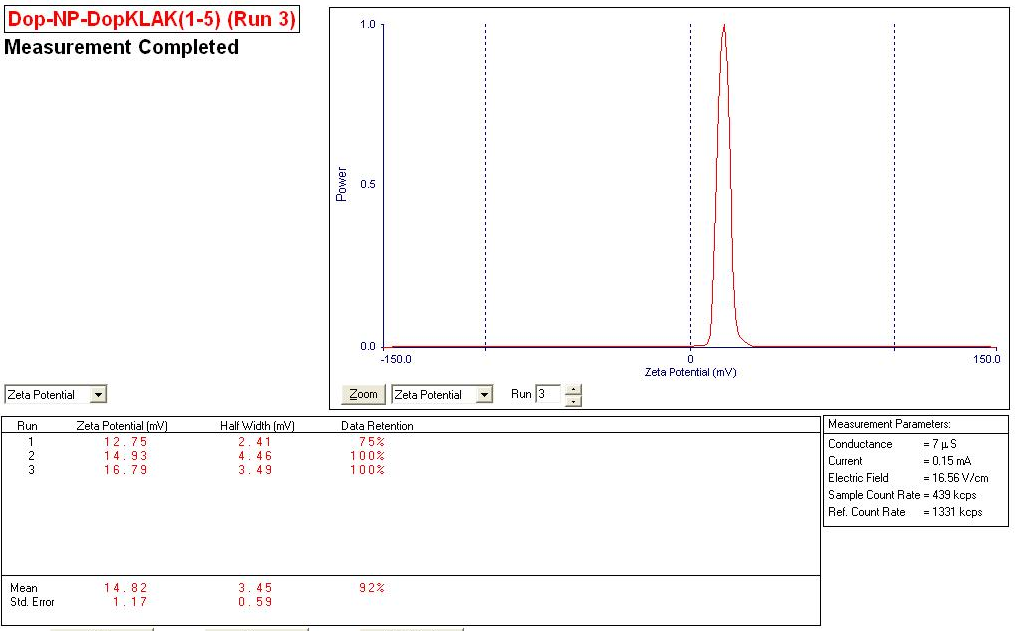


**Figure S13.** Zeta potential of PLFAERD[KLAKLAK]2**C**GKRK- and Dp44mT-derivative- tethered dopamine-coated Fe/Fe3O4 (Dop-Fe/Fe3O4 Peptide/Dp44mT (1:5)), ratio of Peptide to Dp44mT = 1/74, see Table 2.


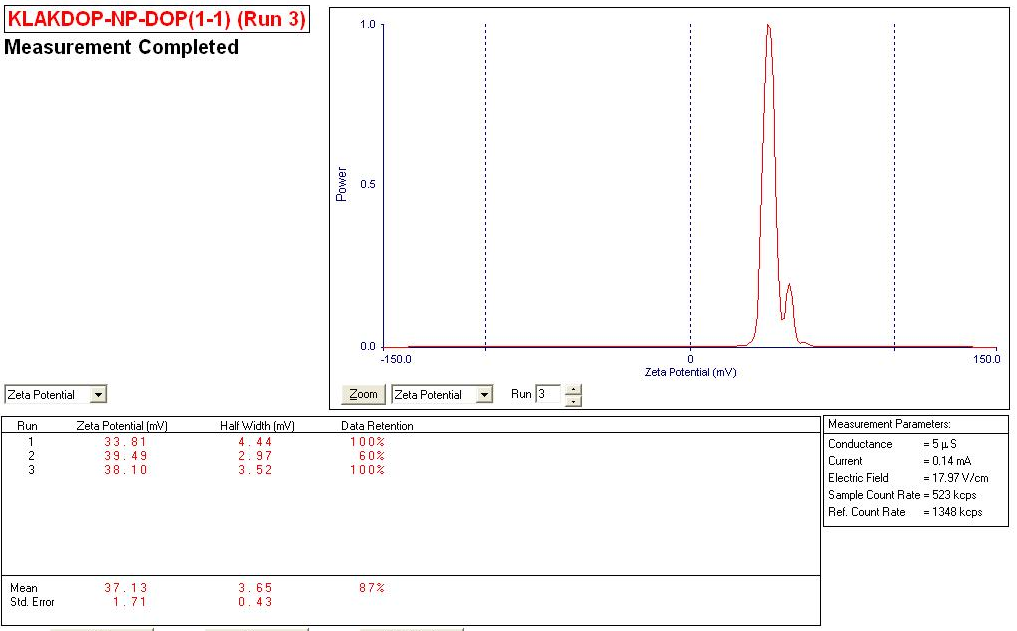


**Figure S14.** Zeta potential of PLFAERD[KLAKLAK]2**C**GKRK- and Dp44mT-derivative- tethered dopamine-coated Fe/Fe3O4 (Dop-Fe/Fe3O4 Peptide/Dp44mT (1:1)), ratio of Peptide to Dp44mT = 1/27, see Table 2.


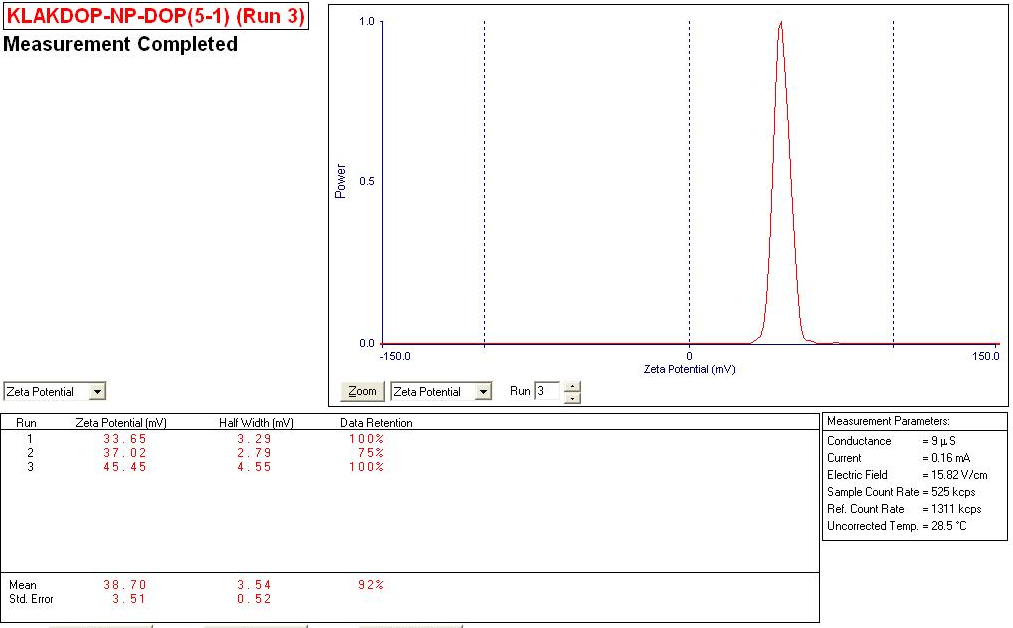


**Figure S15.** Zeta potential of PLFAERD[KLAKLAK]2**C**GKRK- and Dp44mT-derivative- tethered dopamine-coated Fe/Fe3O4 (Dop-Fe/Fe3O4 Peptide/Dp44mT (5:1)), ratio of Peptide to Dp44mT = 1/3.2, see Table 2.


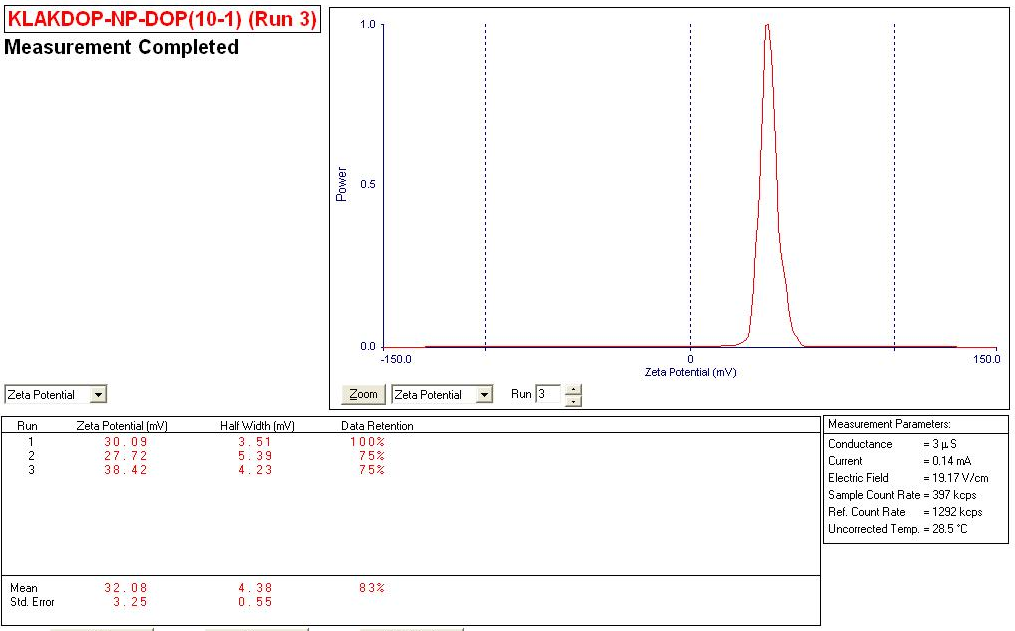


**Figure S16.** Zeta potential of PLFAERD[KLAKLAK]2**C**GKRK- and Dp44mT-derivative- tethered dopamine-coated Fe/Fe3O4 (Dop-Fe/Fe3O4 Peptide/Dp44mT (10:1)), ratio of Peptide to Dp44mT = 1/1.1, see Table 2.


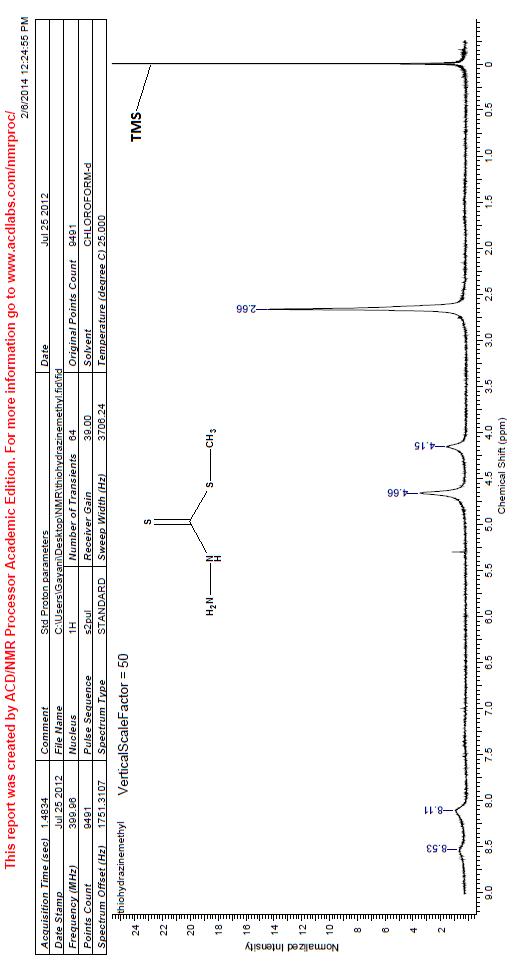


**Figure S17.** 1HNMR of Hydrazinecarbodithioic acid methylester1H NMR (CDCl3-d, δ ppm) 2.66 (s, 3H, CH3), 4.15(s, 2H, NH3+ (protonated nitrogen) D2O exchangeable) 4.66 (s, 2H, NH2, D2O exchangeable), 8.11 (s, H, NH2+CS (protonated nitrogen), D2O exchangeable), 8.53 (s, H, NHCS, D2O exchangeable).


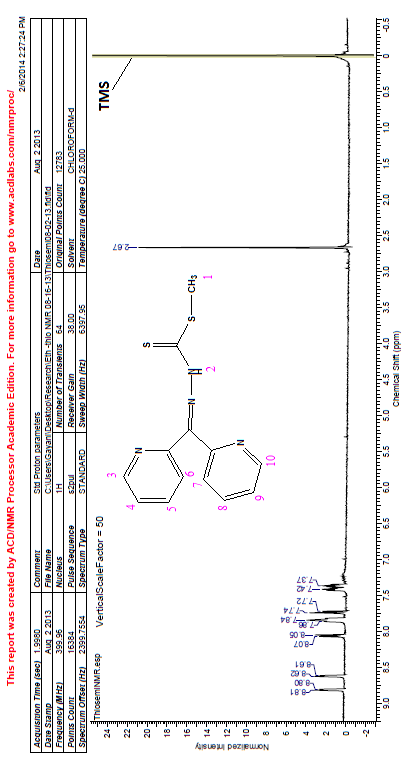


**Figure S18.** 1HNMR of the thiosemicarbazone iron chelator (compound **3**)N´-(Di-pyridin-2yl-methylene)- hydrazinecarbodithioic acid methylester.1H NMR (CDCl3, δ ppm) 2.67 (s, 3H, CH3); 7.52 (s, H, NH); 8.81 (d, H3), 8.62 (d, H8), 8.06 (d, H6), 7.84 (m, H5 & 8), 7.73 (d, H7), 7.42 (m, H4), 7.37 (m, H9) of the Ar-H.


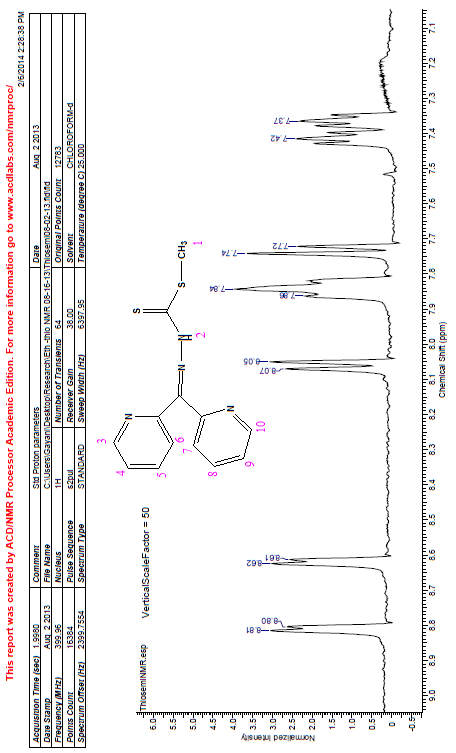


**Figure S19**. 1HNMR of the aryl hydrogens of the thiosemicarbazone iron chelator, N´-(Di-pyridin-2yl-methylene)- hydrazinecarbodithioic acid methylester.1H NMR (CDCl3, δ ppm) 2.67 (s, 3H, CH3); 7.52 (s, H, NH); 8.81 (d, H3), 8.62 (d, H8), 8.06 (d, H6), 7.84 (m, H5 & 8), 7.73 (d, H7), 7.42 (m, H4), 7.37 (m, H9) of the Ar-H.


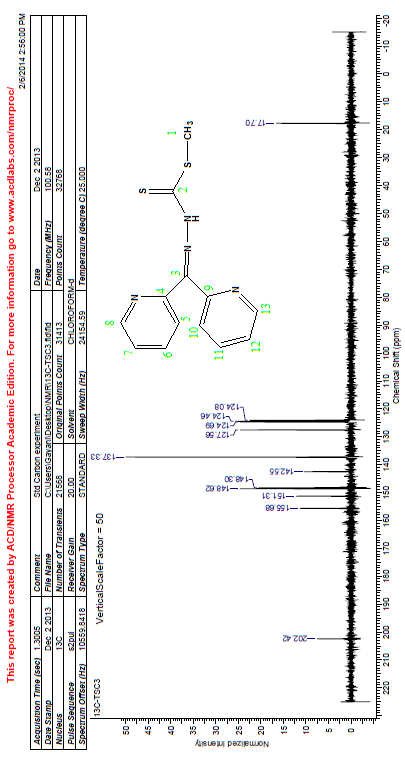


**Figure S20**. 13CNMR of the thiosemicarbazone iron chelatorN´-(Di-pyridin-2yl-methylene)- hydrazinecarbodithioic acid methylester.13C NMR (CDCl3, δ ppm, J, Hz): 17.70 (CH3); 124.08 (C10), 124.46 (C5), 124.69 (C12), 127.56 (C7), 137.33 (C6 & 11), 142.55 (C13), 148.30 (C8), 148.62 (C9), 151.31 (C4) of the Ar-C; 155.68 (C=N); 202.44 (C=S).
